# Supplementary material for: Probing the Subtle Differences between Promethium and Curium
Source: Research Square preprint supplement (doi:10.21203/rs.3.rs-4788524/v1), 2024-08-07

## checkCIF/PLATON report

Structure factors have been supplied for datablock(s) pmterpytry1

THIS REPORT IS FOR GUIDANCE ONLY. IF USED AS PART OF A REVIEW PROCEDURE FOR PUBLICATION, IT SHOULD NOT REPLACE THE EXPERTISE OF AN EXPERIENCED CRYSTALLOGRAPHIC REFEREE.

No syntax errors found.      CIF dictionary      Interpreting this report

### Datablock: pmterpytry1

---

Bond precision:      C-C = 0.0082 Å

Wavelength=0.71073

Cell:                      a=11.1738 (4)                      b=15.9791 (6)                      c=16.2596 (6)  
                              alpha=105.8847 (18)                      beta=95.6780 (19)                      gamma=95.970 (2)  
Temperature:      300 K

|                        | Calculated                                       | Reported                                         |
|------------------------|--------------------------------------------------|--------------------------------------------------|
| Volume                 | 2752.37 (18)                                     | 2752.37 (18)                                     |
| Space group            | P -1                                             | P -1                                             |
| Hall group             | -P 1                                             | -P 1                                             |
| Moiety formula         | C30 H22 N8 O6 Pm, C15 H11 N7 O12 Pm, 2 (C2 H3 N) | C30 H22 N8 O6 Pm, C15 H11 N7 O12 Pm, 2 (C2 H3 N) |
| Sum formula            | C49 H39 N17 O18 Pm2                              | C49 H39 N17 O18 Pm2                              |
| Mr                     | 1447.81                                          | 1447.81                                          |
| Dx, g cm <sup>-3</sup> | 1.747                                            | 1.747                                            |
| Z                      | 2                                                | 2                                                |
| Mu (mm <sup>-1</sup> ) | 2.071                                            | 2.071                                            |
| F000                   | 1436.0                                           | 1436.0                                           |
| F000'                  | 1435.90                                          |                                                  |
| h, k, lmax             | 14, 21, 21                                       | 14, 21, 21                                       |
| Nref                   | 13742                                            | 13384                                            |
| Tmin, Tmax             | 0.513, 0.615                                     | 0.590, 0.707                                     |
| Tmin'                  | 0.503                                            |                                                  |

Correction method= # Reported T Limits: Tmin=0.590 Tmax=0.707  
AbsCorr = MULTI-SCAN

Data completeness= 0.974

Theta (max)= 28.334

R(reflections)= 0.0387 ( 9890)

wR2(reflections)=  
0.1034 ( 13384)

S = 1.041

Npar= 786

---

The following ALERTS were generated. Each ALERT has the format

**test-name\_ALERT\_alert-type\_alert-level.**

Click on the hyperlinks for more details of the test.

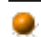

#### Alert level B

PLAT242\_ALERT\_2\_B Low 'MainMol' Ueq as Compared to Neighbors of N15 Check

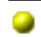

#### Alert level C

PLAT220\_ALERT\_2\_C NonSolvent Resd 1 C Ueq(max)/Ueq(min) Range 3.4 Ratio  
PLAT234\_ALERT\_4\_C Large Hirshfeld Difference O18B --N15 0.17 Ang.  
PLAT241\_ALERT\_2\_C High 'MainMol' Ueq as Compared to Neighbors of C13 Check  
PLAT241\_ALERT\_2\_C High 'MainMol' Ueq as Compared to Neighbors of 09 Check  
PLAT241\_ALERT\_2\_C High 'MainMol' Ueq as Compared to Neighbors of O10 Check  
PLAT241\_ALERT\_2\_C High 'MainMol' Ueq as Compared to Neighbors of O16 Check  
PLAT242\_ALERT\_2\_C Low 'MainMol' Ueq as Compared to Neighbors of Pm2 Check  
PLAT242\_ALERT\_2\_C Low 'MainMol' Ueq as Compared to Neighbors of O17 Check  
PLAT242\_ALERT\_2\_C Low 'MainMol' Ueq as Compared to Neighbors of N12 Check  
PLAT242\_ALERT\_2\_C Low 'MainMol' Ueq as Compared to Neighbors of N13 Check  
PLAT244\_ALERT\_4\_C Low 'Solvent' Ueq as Compared to Neighbors of C46 Check  
PLAT244\_ALERT\_4\_C Low 'Solvent' Ueq as Compared to Neighbors of C48 Check  
PLAT260\_ALERT\_2\_C Large Average Ueq of Residue Including N16 0.107 Check  
PLAT260\_ALERT\_2\_C Large Average Ueq of Residue Including N17 0.130 Check  
PLAT342\_ALERT\_3\_C Low Bond Precision on C-C Bonds ..... 0.00825 Ang.  
PLAT905\_ALERT\_3\_C Negative K value in the Analysis of Variance ... -1.370 Report  
PLAT910\_ALERT\_3\_C Missing # of FCF Reflection(s) Below Theta(Min). 6 Note  
1 0 0, 0 1 0, 0 -1 1, -1 0 1, 0 0 1, 0 1 1,  
PLAT911\_ALERT\_3\_C Missing FCF Refl Between Thmin & STh/L= 0.600 276 Report  
2 0 0, 3 0 0, 5 0 0, -4 1 0, 1 1 0, 2 1 0,  
4 1 0, -2 2 0, 0 2 0, 1 2 0, 5 2 0, -3 3 0,  
-2 3 0, -1 3 0, -6 4 0, -1 4 0, 0 4 0, 1 4 0,  
3 4 0, -6 5 0, -3 5 0, 0 5 0, 2 5 0, -2 6 0,  
-1 7 0, 0 7 0, 1 8 0, -1 -8 1, -2 -7 1, 3 -7 1,  
-3 -6 1, -1 -6 1, 0 -6 1, -4 -5 1, -2 -5 1, 1 -5 1,  
4 -5 1, -3 -4 1, -1 -4 1, 1 -4 1, 2 -4 1, -4 -3 1,  
-1 -3 1, 0 -3 1, 2 -3 1, 4 -3 1, -5 -2 1, -3 -2 1,  
-2 -2 1, -1 -2 1, 0 -2 1, 1 -2 1, 5 -2 1, -4 -1 1,  
-3 -1 1, -2 -1 1, -1 -1 1, 1 -1 1, -5 0 1, -3 0 1,  
-2 0 1, 1 0 1, 2 0 1, 3 0 1, -4 1 1, -3 1 1,  
-1 1 1, 1 1 1, 4 1 1, -2 2 1, 0 2 1, 1 2 1,  
3 2 1, 4 2 1, -2 3 1, 0 3 1, 1 3 1, -5 4 1,  
-2 4 1, 0 4 1, 1 4 1, -1 5 1, 0 5 1, -4 6 1,  
1 6 1, -3 7 1, 2 7 1, 0 -8 2, -2 -7 2, 1 -7 2,  
2 -6 2, 3 -5 2, 4 -5 2, -3 -4 2, 5 -4 2, -3 -3 2,  
PLAT913\_ALERT\_3\_C Missing # of Very Strong Reflections in FCF .... 78 Note  
1 1 0, 5 2 0, -2 3 0, -1 3 0, 0 4 0, 1 4 0,  
-3 5 0, 0 5 0, 2 5 0, -2 6 0, -1 7 0, 0 7 0,  
1 8 0, 3 -7 1, -1 -6 1, -1 -4 1, 2 -4 1, -4 -3 1,  
0 -2 1, -3 -1 1, 1 -1 1, -3 0 1, -2 0 1, 3 0 1,  
PLAT934\_ALERT\_3\_C Number of (Iobs-Icalc)/Sigma(W) > 10 Outliers .. 1 Check  
-2 0 2,  
PLAT975\_ALERT\_2\_C Check Calcd Resid. Dens. 1.01Ang From O14 . 0.83 eA-3

---

## ● Alert level G

|                   |                                                  |       |                 |      |             |
|-------------------|--------------------------------------------------|-------|-----------------|------|-------------|
| PLAT232_ALERT_2_G | Hirshfeld Test Diff (M-X)                        | Pm2   | --O10           | .    | 6.0 s.u.    |
| PLAT232_ALERT_2_G | Hirshfeld Test Diff (M-X)                        | Pm2   | --O13           | .    | 5.5 s.u.    |
| PLAT232_ALERT_2_G | Hirshfeld Test Diff (M-X)                        | Pm2   | --O14           | .    | 10.5 s.u.   |
| PLAT300_ALERT_4_G | Atom Site Occupancy of O18B                      |       | Constrained at  |      | 0.62 Check  |
| PLAT300_ALERT_4_G | Atom Site Occupancy of O18A                      |       | Constrained at  |      | 0.38 Check  |
| PLAT302_ALERT_4_G | Anion/Solvent/Minor-Residue Disorder (Resd 2)    |       |                 |      | 3% Note     |
| PLAT395_ALERT_2_G | Deviating X-O-Y Angle From 120 for O18A          |       |                 | .    | 44.0 Degree |
| PLAT779_ALERT_4_G | Suspect or Irrelevant (Bond) Angle(s) in CIF ... |       |                 |      | 43.90 Deg.  |
|                   | N15 -O17 -O18A 1_555 1_555 1_555 .....           |       |                 | #    | 198 Check   |
| PLAT779_ALERT_4_G | Suspect or Irrelevant (Bond) Angle(s) in CIF ... |       |                 |      | 44.00 Deg.  |
|                   | N15 -O18A -O17 1_555 1_555 1_555 .....           |       |                 | #    | 199 Check   |
| PLAT790_ALERT_4_G | Centre of Gravity not Within Unit Cell: Resd.    |       |                 | #    | 2 Note      |
|                   | C15 H11 N7 O12 Pm                                |       |                 |      |             |
| PLAT790_ALERT_4_G | Centre of Gravity not Within Unit Cell: Resd.    |       |                 | #    | 3 Note      |
|                   | C2 H3 N                                          |       |                 |      |             |
| PLAT790_ALERT_4_G | Centre of Gravity not Within Unit Cell: Resd.    |       |                 | #    | 4 Note      |
|                   | C2 H3 N                                          |       |                 |      |             |
| PLAT912_ALERT_4_G | Missing # of FCF Reflections Above STh/L=        | 0.600 |                 |      | 76 Note     |
| PLAT941_ALERT_3_G | Average HKL Measurement Multiplicity .....       |       |                 |      | 2.1 Low     |
| PLAT969_ALERT_5_G | The 'Henn et al.' R-Factor-gap value .....       |       |                 |      | 2.069 Note  |
|                   | Predicted wR2: Based on SigI**2                  | 5.00  | or SHELX Weight | 9.93 |             |
| PLAT978_ALERT_2_G | Number C-C Bonds with Positive Residual Density. |       |                 |      | 2 Info      |

---

0 **ALERT level A** = Most likely a serious problem - resolve or explain  
 1 **ALERT level B** = A potentially serious problem, consider carefully  
 21 **ALERT level C** = Check. Ensure it is not caused by an omission or oversight  
 16 **ALERT level G** = General information/check it is not something unexpected

0 ALERT type 1 CIF construction/syntax error, inconsistent or missing data  
 18 ALERT type 2 Indicator that the structure model may be wrong or deficient  
 7 ALERT type 3 Indicator that the structure quality may be low  
 12 ALERT type 4 Improvement, methodology, query or suggestion  
 1 ALERT type 5 Informative message, check

---

It is advisable to attempt to resolve as many as possible of the alerts in all categories. Often the minor alerts point to easily fixed oversights, errors and omissions in your CIF or refinement strategy, so attention to these fine details can be worthwhile. In order to resolve some of the more serious problems it may be necessary to carry out additional measurements or structure refinements. However, the purpose of your study may justify the reported deviations and the more serious of these should normally be commented upon in the discussion or experimental section of a paper or in the "special\_details" fields of the CIF. checkCIF was carefully designed to identify outliers and unusual parameters, but every test has its limitations and alerts that are not important in a particular case may appear. Conversely, the absence of alerts does not guarantee there are no aspects of the results needing attention. It is up to the individual to critically assess their own results and, if necessary, seek expert advice.

### **Publication of your CIF in IUCr journals**

A basic structural check has been run on your CIF. These basic checks will be run on all CIFs submitted for publication in IUCr journals (*Acta Crystallographica*, *Journal of Applied Crystallography*, *Journal of Synchrotron Radiation*); however, if you intend to submit to *Acta Crystallographica Section C* or *E* or *IUCrData*, you should make sure that full publication checks are run on the final version of your CIF prior to submission.

### **Publication of your CIF in other journals**

Please refer to the *Notes for Authors* of the relevant journal for any special instructions relating to CIF submission.

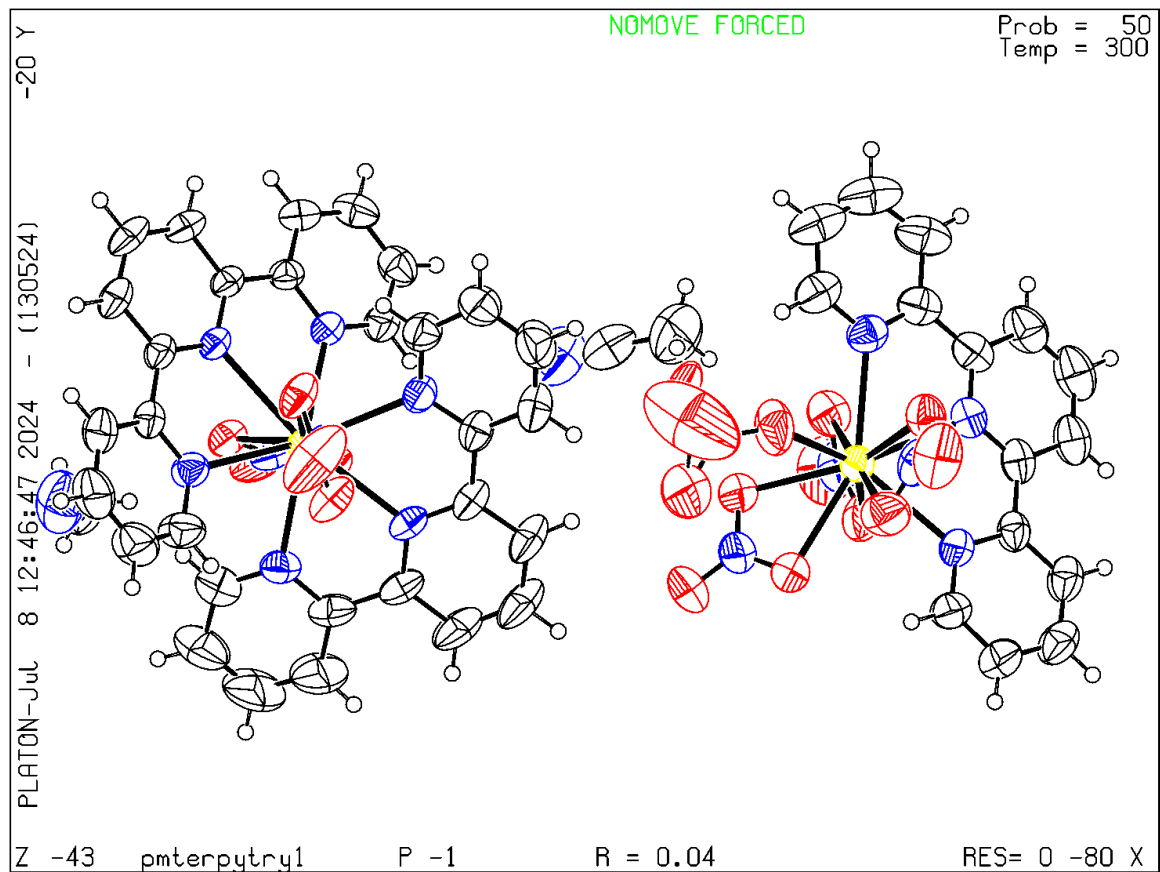

Supplement: Supplementary file 6 [file PmTerpy_checkcif.pdf › PmTerpy_checkcif.pdf]
