# Supplementary material for: Probing the Subtle Differences between Promethium and Curium
Source: Research Square preprint supplement (doi:10.21203/rs.3.rs-4788524/v1), 2024-08-07

## checkCIF/PLATON report

Structure factors have been supplied for datablock(s) try1

THIS REPORT IS FOR GUIDANCE ONLY. IF USED AS PART OF A REVIEW PROCEDURE FOR PUBLICATION, IT SHOULD NOT REPLACE THE EXPERTISE OF AN EXPERIENCED CRYSTALLOGRAPHIC REFEREE.

No syntax errors found.      CIF dictionary      Interpreting this report

### Datablock: try1

---

Bond precision:      C-C = 0.0155 A

Wavelength=0.71073

Cell:                      a=11.0882(13)                      b=16.1610(17)                      c=17.3390(15)  
                                 alpha=84.881(6)                      beta=78.600(6)                      gamma=85.512(6)  
Temperature:              299 K

|                        | Calculated                                         | Reported                                           |
|------------------------|----------------------------------------------------|----------------------------------------------------|
| Volume                 | 3027.8(5)                                          | 3027.8(5)                                          |
| Space group            | P -1                                               | P -1                                               |
| Hall group             | -P 1                                               | -P 1                                               |
| Moiety formula         | C30 H19 Ce N8 O6, C15 H11<br>Ce N7 O12 [+ solvent] | C30 H19 Ce N8 O6, C15 H11<br>Ce N7 O12 [+ solvent] |
| Sum formula            | C45 H30 Ce2 N15 O18 [+<br>solvent]                 | C45 H30 Ce2 N15 O18 [+<br>solvent]                 |
| Mr                     | 1349.08                                            | 1349.08                                            |
| Dx, g cm <sup>-3</sup> | 1.480                                              | 1.483                                              |
| Z                      | 2                                                  | 2                                                  |
| Mu (mm <sup>-1</sup> ) | 1.560                                              | 1.560                                              |
| F000                   | 1330.0                                             | 1336.0                                             |
| F000'                  | 1329.58                                            |                                                    |
| h, k, lmax             | 13, 19, 20                                         | 13, 19, 20                                         |
| Nref                   | 11188                                              | 10745                                              |
| Tmin, Tmax             | 0.387, 0.675                                       | 0.582, 0.745                                       |
| Tmin'                  | 0.298                                              |                                                    |

Correction method= # Reported T Limits: Tmin=0.582 Tmax=0.745  
AbsCorr = MULTI-SCAN

Data completeness= 0.960

Theta(max)= 25.423

R(reflections)= 0.0592( 7857)

wR2(reflections)=  
0.1873( 10745)

S = 1.039

Npar= 721

The following ALERTS were generated. Each ALERT has the format

**test-name\_ALERT\_alert-type\_alert-level.**

Click on the hyperlinks for more details of the test.

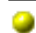

### Alert level C

PLAT029\_ALERT\_3\_C \_diffn\_measured\_fraction\_theta\_full value Low . 0.973 Why?  
PLAT230\_ALERT\_2\_C Hirshfeld Test Diff for O003 --N00N . 5.4 s.u.  
PLAT230\_ALERT\_2\_C Hirshfeld Test Diff for C01R --C024 . 6.0 s.u.  
PLAT234\_ALERT\_4\_C Large Hirshfeld Difference C023 --C026 . 0.19 Ang.  
PLAT234\_ALERT\_4\_C Large Hirshfeld Difference C025 --C028 . 0.22 Ang.  
PLAT234\_ALERT\_4\_C Large Hirshfeld Difference O000 --N00Z . 0.18 Ang.  
PLAT234\_ALERT\_4\_C Large Hirshfeld Difference C01L --C024 . 0.16 Ang.  
PLAT234\_ALERT\_4\_C Large Hirshfeld Difference C01M --C01W . 0.20 Ang.  
PLAT241\_ALERT\_2\_C High 'MainMol' Ueq as Compared to Neighbors of O00D Check  
PLAT241\_ALERT\_2\_C High 'MainMol' Ueq as Compared to Neighbors of O009 Check  
PLAT241\_ALERT\_2\_C High 'MainMol' Ueq as Compared to Neighbors of O00H Check  
PLAT241\_ALERT\_2\_C High 'MainMol' Ueq as Compared to Neighbors of O000 Check  
PLAT241\_ALERT\_2\_C High 'MainMol' Ueq as Compared to Neighbors of O00V Check  
PLAT241\_ALERT\_2\_C High 'MainMol' Ueq as Compared to Neighbors of C024 Check  
PLAT242\_ALERT\_2\_C Low 'MainMol' Ueq as Compared to Neighbors of Ce01 Check  
PLAT242\_ALERT\_2\_C Low 'MainMol' Ueq as Compared to Neighbors of N00J Check  
PLAT242\_ALERT\_2\_C Low 'MainMol' Ueq as Compared to Neighbors of Ce02 Check  
PLAT242\_ALERT\_2\_C Low 'MainMol' Ueq as Compared to Neighbors of N00N Check  
PLAT242\_ALERT\_2\_C Low 'MainMol' Ueq as Compared to Neighbors of N00S Check  
PLAT242\_ALERT\_2\_C Low 'MainMol' Ueq as Compared to Neighbors of N00Z Check  
PLAT342\_ALERT\_3\_C Low Bond Precision on C-C Bonds ..... 0.01545 Ang.  
PLAT905\_ALERT\_3\_C Negative K value in the Analysis of Variance ... -4.303 Report  
PLAT911\_ALERT\_3\_C Missing FCF Refl Between Thmin & STh/L= 0.600 290 Report  
-3 1 0, -1 1 0, 1 1 0, 3 1 0, -4 2 0, -3 2 0,  
-2 2 0, 0 2 0, -3 3 0, 2 3 0, 1 4 0, -5 5 0,  
-4 5 0, 0 5 0, 1 6 0, 2 6 0, -3 8 0, -7 10 0,  
-1 16 0, 5-15 1, -1 -8 1, -3 -5 1, -2 -5 1, 0 -5 1,  
2 -5 1, -3 -4 1, -2 -4 1, -1 -4 1, 3 -4 1, 5 -4 1,  
-2 -3 1, -1 -3 1, 0 -3 1, 1 -3 1, 4 -3 1, -3 -2 1,  
0 -2 1, 1 -2 1, 3 -2 1, 4 -2 1, 1 -1 1, 5 -1 1,  
-2 0 1, -1 0 1, 1 0 1, 2 0 1, -5 1 1, -4 1 1,  
-1 1 1, -4 2 1, -2 2 1, -1 2 1, 0 2 1, 4 2 1,  
-1 3 1, 0 3 1, 1 3 1, -3 4 1, 1 4 1, 3 4 1,  
1 6 1, 3 6 1, -8 7 1, -7 7 1, 2 9 1, -2 10 1,  
-4 11 1, 0 11 1, -6 12 1, 1 13 1, 0 17 1, 0 -6 2,  
1 -6 2, -2 -5 2, 0 -5 2, -3 -4 2, 1 -4 2, 4 -3 2,  
-5 -2 2, -1 -2 2, 2 -2 2, -4 -1 2, -3 -1 2, -2 -1 2,  
0 -1 2, 3 -1 2, 0 0 2, 1 0 2, 2 0 2, -3 1 2,  
1 1 2, 0 2 2, 2 2 2, -4 3 2, 1 3 2, -2 4 2,  
PLAT913\_ALERT\_3\_C Missing # of Very Strong Reflections in FCF .... 34 Note  
-3 1 0, 0 1 0, 1 1 0, -3 2 0, 0 5 0, 3 -2 1,  
0 -1 1, 1 -1 1, 5 -1 1, -1 1 1, -4 2 1, 1 3 1,  
1 4 1, 1 -4 2, 0 -1 2, 1 1 2, 0 -3 3, -3 -2 3,  
1 -2 3, -2 -1 3, 0 -6 4, 1 -5 4, -4 -1 4, 4 -1 4,  
PLAT971\_ALERT\_2\_C Check Calcd Resid. Dens. 1.04Ang From Ce01 2.10 eA-3

|                   |                                           |                   |            |
|-------------------|-------------------------------------------|-------------------|------------|
| PLAT971_ALERT_2_C | Check Calcd Resid. Dens.                  | 1.07Ang From Ce02 | 1.62 eA-3  |
| PLAT971_ALERT_2_C | Check Calcd Resid. Dens.                  | 1.08Ang From Ce02 | 1.52 eA-3  |
| PLAT975_ALERT_2_C | Check Calcd Resid. Dens.                  | 0.96Ang From O003 | 1.05 eA-3  |
| PLAT975_ALERT_2_C | Check Calcd Resid. Dens.                  | 0.90Ang From O004 | 1.03 eA-3  |
| PLAT975_ALERT_2_C | Check Calcd Resid. Dens.                  | 1.08Ang From C022 | 0.64 eA-3  |
| PLAT977_ALERT_2_C | Check Negative Difference Density on H01Z |                   | -0.32 eA-3 |

## Alert level G

CELLZ01\_ALERT\_1\_G Difference between formula and atom\_site contents detected.

CELLZ01\_ALERT\_1\_G ALERT: Large difference may be due to a

symmetry error - see SYMMG tests

From the CIF: \_cell\_formula\_units\_Z 2

From the CIF: \_chemical\_formula\_sum C45 H30 Ce2 N15 O18 [+ solvent]

TEST: Compare cell contents of formula and atom\_site data

| atom  | Z*formula | cif sites | diff |
|-------|-----------|-----------|------|
| C     | 90.00     | 90.00     | 0.00 |
| H     | 60.00     | 60.00     | 0.00 |
| Ce    | 4.00      | 4.00      | 0.00 |
| N     | 30.00     | 30.00     | 0.00 |
| O     | 36.00     | 36.00     | 0.00 |
| [+]   | 2.00      | 0.00      | 2.00 |
| solve | 2.00      | 0.00      | 2.00 |

|                   |                                                  |              |
|-------------------|--------------------------------------------------|--------------|
| PLAT063_ALERT_4_G | Crystal Size Possibly too Large for Beam Size .. | 0.75 mm      |
| PLAT083_ALERT_2_G | SHELXL Second Parameter in WGHT Unusually Large  | 9.68 Why ?   |
| PLAT154_ALERT_1_G | The s.u.'s on the Cell Angles are Equal ..(Note) | 0.006 Degree |
| PLAT180_ALERT_4_G | Check Cell Rounding: # of Values Ending with 0 = | 3 Note       |
| PLAT232_ALERT_2_G | Hirshfeld Test Diff (M-X) Ce02 --O003            | 5.3 s.u.     |
| PLAT343_ALERT_2_G | Unusual sp? Angle Range in Main Residue for      | C019 Check   |
| PLAT343_ALERT_2_G | Unusual sp? Angle Range in Main Residue for      | C022 Check   |
| PLAT343_ALERT_2_G | Unusual sp? Angle Range in Main Residue for      | C026 Check   |
| PLAT432_ALERT_2_G | Short Inter X...Y Contact O00X ..C01Y            | 2.92 Ang.    |

x,y,z = 1\_555 Check

PLAT606\_ALERT\_4\_G Solvent Accessible VOID(S) in Structure ..... ! Info

PLAT720\_ALERT\_4\_G Number of Unusual/Non-Standard Labels ..... 110 Note

|      |      |      |      |      |      |      |      |
|------|------|------|------|------|------|------|------|
| Ce01 | Ce02 | O003 | O004 | O005 | O006 | N007 | O008 |
| O009 | O00A | O00B | N00C | O00D | N00E | N00F | N00G |
| O00H | N00I | N00J | N00K | N00L | N00M | N00N | O00O |
| N00P | N00Q | C00R | N00S | C00T | O00U | O00V | O00W |
| O00X | C00Y | H00Y | N00Z | C010 | C011 | C012 | H012 |
| O013 | O014 | C015 | H015 | C016 | C017 | C018 | H018 |
| C019 | C01A | C01B | C01C | H01C | C01D | C01E | H01E |
| C01F | O01G | C01H | C01I | C01J | H01J | C01K | H01K |
| C01L | H01L | C01M | H01M | C01N | H01N | C01O | H01O |
| C01P | H01P | C01Q | H01Q | C01R | H01R | C01S | H01S |
| C01T | H01T | C01U | H01U | C01V | H01V | C01W | H01W |
| C01X | H01X | C01Y | H01Y | C01Z | H01Z | C020 | H020 |
| C021 | H021 | C022 | C023 | H023 | C024 | H024 | C025 |
| H025 | C026 | C028 | H028 | C029 | H029 |      |      |

PLAT868\_ALERT\_4\_G ALERTS Due to the Use of \_smtbx\_masks Suppressed ! Info

PLAT910\_ALERT\_3\_G Missing # of FCF Reflection(s) Below Theta(Min). 4 Note

0 1 0, 0 -1 1, 0 0 1, 0 1 1,

PLAT912\_ALERT\_4\_G Missing # of FCF Reflections Above STh/L= 0.600 149 Note

PLAT933\_ALERT\_2\_G Number of HKL-OMIT Records in Embedded .res File 2 Note

1 0 3, -1 5 6,

PLAT941\_ALERT\_3\_G Average HKL Measurement Multiplicity ..... 2.0 Low

PLAT969\_ALERT\_5\_G The 'Henn et al.' R-Factor-gap value ..... 2.783 Note  
 Predicted wR2: Based on SigI\*\*2 6.73 or SHELX Weight 18.04  
 PLAT978\_ALERT\_2\_G Number C-C Bonds with Positive Residual Density. 0 Info

---

0 **ALERT level A** = Most likely a serious problem - resolve or explain  
 0 **ALERT level B** = A potentially serious problem, consider carefully  
 31 **ALERT level C** = Check. Ensure it is not caused by an omission or oversight  
 20 **ALERT level G** = General information/check it is not something unexpected

3 ALERT type 1 CIF construction/syntax error, inconsistent or missing data  
 29 ALERT type 2 Indicator that the structure model may be wrong or deficient  
 7 ALERT type 3 Indicator that the structure quality may be low  
 11 ALERT type 4 Improvement, methodology, query or suggestion  
 1 ALERT type 5 Informative message, check

---

It is advisable to attempt to resolve as many as possible of the alerts in all categories. Often the minor alerts point to easily fixed oversights, errors and omissions in your CIF or refinement strategy, so attention to these fine details can be worthwhile. In order to resolve some of the more serious problems it may be necessary to carry out additional measurements or structure refinements. However, the purpose of your study may justify the reported deviations and the more serious of these should normally be commented upon in the discussion or experimental section of a paper or in the "special\_details" fields of the CIF. checkCIF was carefully designed to identify outliers and unusual parameters, but every test has its limitations and alerts that are not important in a particular case may appear. Conversely, the absence of alerts does not guarantee there are no aspects of the results needing attention. It is up to the individual to critically assess their own results and, if necessary, seek expert advice.

### Publication of your CIF in IUCr journals

A basic structural check has been run on your CIF. These basic checks will be run on all CIFs submitted for publication in IUCr journals (*Acta Crystallographica*, *Journal of Applied Crystallography*, *Journal of Synchrotron Radiation*); however, if you intend to submit to *Acta Crystallographica Section C* or *E* or *IUCrData*, you should make sure that full publication checks are run on the final version of your CIF prior to submission.

### Publication of your CIF in other journals

Please refer to the *Notes for Authors* of the relevant journal for any special instructions relating to CIF submission.

Datablock try1 - ellipsoid plot

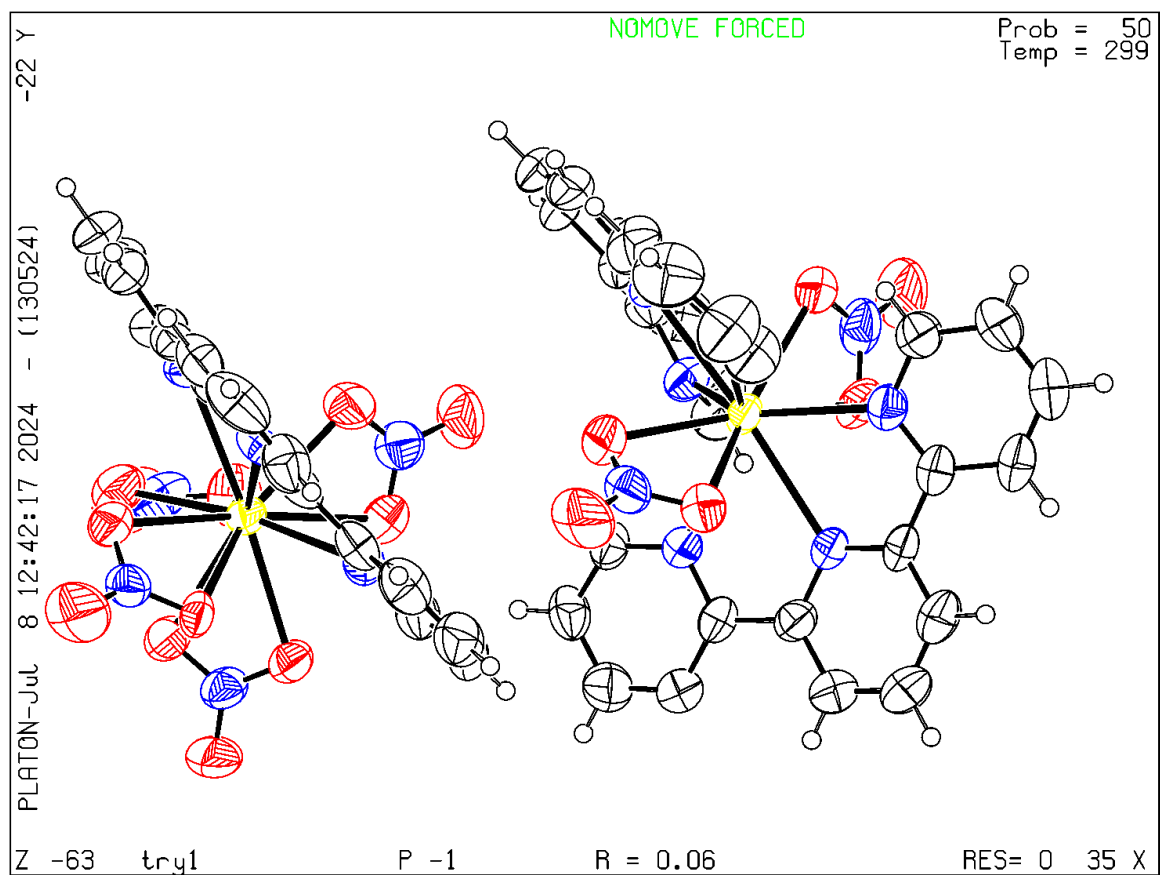

Supplement: Supplementary file 1 [file CeTerpy_checkcif.pdf › CeTerpy_checkcif.pdf]
